# Supplementary material for: Maternal and Neonatal Hair Cortisol Levels Are Associated with Infant Neurodevelopment at Six Months of Age
Source: PubMed Central journal article supplement (PMC6912650; doi:10.3390/jcm8112015), 2019-11-19
Supplement: jcm-08-02015-s001.pdf [file jcm-08-02015-s001.pdf]

**Table S1.** Differences in hair cortisol levels and infants' neurodevelopment between boys and girls

|                                      |                    | <b>Boys</b>         | <b>Girls</b>        |               |                |
|--------------------------------------|--------------------|---------------------|---------------------|---------------|----------------|
|                                      |                    | <b>(n=19) X(SD)</b> | <b>(n=22) X(SD)</b> | <b>T-Test</b> | <b>P-value</b> |
| <b>Maternal hair cortisol levels</b> | T1                 | 317.20              | 378.18              | -0.59         | 0.55           |
|                                      | T2                 | 494.33              | 322.75              | -1.18         | 0.24           |
|                                      | T3                 | 393.57              | 371.37              | -0.21         | 0.83           |
|                                      | T4                 | 481.45              | 1041.87             | 1.81          | 0.08           |
| <b>Neonatal Hair cortisol levels</b> |                    | 2490.73             | 2638.80             | 0.33          | 0.73           |
| <b>Neurodevelopment</b>              | Cognitive          | 30.21               | 31.27               | 0.94          | 0.35           |
|                                      | Receptive language | 11.11               | 10.95               | -0.24         | 0.81           |
|                                      | Expresive language | 9.37                | 9.27                | -0.11         | 0.91           |
|                                      | Fine Motor         | 20.68               | 20.86               | 0.19          | 0.84           |
|                                      | Gross Motor        | 23.68               | 23.95               | 0.26          | 0.79           |
